# Supplementary material for: Diagnostic Value of Multimodal Intraoperative Neuromonitoring by Combining Somatosensory-With Motor-Evoked Potential in Posterior Decompression Surgery for Thoracic Spinal Stenosis
Source: Front Neurosci. 2022 Jun 10;16:879435. doi: 10.3389/fnins.2022.879435 (PMC9226726; doi:10.3389/fnins.2022.879435)
Supplement: Supplementary file 1 [file Table_1.XLSX]

## Sheet: Sheet1
IONM	Operated level (ref. = “T9-T12”)	Duration of symptoms (months)	Estimated blood loss (ref. = “＜400 ml”)	Decompression level involved (ref. = “single”)	Ages (ref. = “≤50”)	Sex (ref. = “Male”)	Smoker (ref. = “no”)	Chronic hypertension (ref. = “no”)	Diabetes mellitus (ref. = “no”)	Impairment of gait (ref. = “no”)	Preoperative myelopathy (ref. = “≥16”)
2	3	2	2	2	1	2	1	1	1	2	2
2	2	2	2	2	2	2	2	1	1	2	3
2	1	2	2	2	2	2	1	1	1	1	1
2	2	2	2	2	2	1	2	1	1	2	3
2	1	2	2	2	1	2	1	1	1	1	1
2	2	2	2	1	2	2	2	1	1	2	3
2	3	2	2	2	1	1	1	1	1	2	2
2	2	2	2	2	2	2	2	1	1	2	3
2	3	2	2	2	2	2	1	1	1	2	2
2	2	2	2	2	1	2	2	1	1	2	2
2	1	1	1	2	1	1	1	1	1	1	1
2	3	2	1	2	2	2	2	1	1	2	3
2	3	2	2	1	1	2	1	1	1	2	2
2	1	2	1	2	2	2	2	1	1	2	1
2	3	1	2	1	2	1	1	1	1	2	2
2	3	2	1	2	2	2	2	1	1	2	2
2	3	2	2	2	1	1	1	1	1	2	3
2	3	2	2	2	2	1	2	1	1	2	3
2	1	1	2	2	1	2	1	1	1	1	1
2	3	2	1	2	2	1	2	1	1	2	1
2	1	1	2	2	1	1	1	1	1	1	2
2	3	2	2	2	1	2	2	1	1	2	2
2	3	2	2	2	2	1	1	1	1	2	3
2	1	1	1	2	2	1	2	1	1	1	2
2	3	2	2	2	1	1	1	1	1	2	3
2	3	2	1	1	2	2	2	1	1	2	2
2	2	2	2	2	2	1	1	1	1	2	3
2	3	2	1	2	1	2	2	1	1	2	2
2	3	2	2	1	2	1	1	2	1	2	2
2	3	2	1	2	2	1	2	2	1	2	2
2	3	2	2	2	1	1	1	2	1	2	2
2	3	2	2	1	2	2	2	2	1	2	2
2	3	2	2	1	1	1	1	2	1	2	2
2	3	2	2	2	1	2	2	2	1	2	2
2	3	2	2	2	2	1	1	2	1	2	2
2	3	2	2	2	2	2	2	2	1	2	3
2	3	1	2	2	2	1	1	2	1	2	3
2	1	2	2	2	1	2	2	2	1	2	3
2	2	2	2	2	1	1	1	2	1	2	2
2	3	1	2	1	2	2	1	1	2	2	3
2	1	2	2	2	2	1	1	2	1	1	2
2	3	2	1	1	1	2	1	1	2	2	2
2	1	2	2	2	1	1	1	2	1	2	2
2	1	2	1	2	2	2	1	1	1	2	2
2	3	2	2	2	2	1	1	1	2	2	2
2	3	2	2	2	1	1	1	1	1	2	2
2	3	2	1	2	2	2	1	1	2	2	2
2	3	2	2	2	1	1	1	1	1	2	2
2	3	2	2	2	1	2	1	1	1	2	2
2	3	2	2	2	2	1	1	1	1	2	2
2	1	1	2	2	1	2	1	1	1	1	2
2	3	2	2	2	2	1	1	1	1	2	2
2	1	2	2	2	2	2	1	1	1	2	2
2	1	2	2	2	2	2	1	1	1	2	2
2	1	2	2	2	1	1	1	1	1	2	2
2	3	2	2	2	2	2	1	1	1	2	2
2	3	2	2	2	2	1	1	1	1	2	2
2	3	2	2	2	2	1	1	1	1	2	2
2	1	2	2	2	1	2	1	1	1	2	2
2	1	2	2	2	2	1	1	1	1	2	2
2	1	2	1	2	2	2	1	1	2	2	3
2	3	2	2	2	1	1	1	1	1	2	2
2	1	2	2	2	2	2	1	1	2	2	1
2	3	2	2	2	1	2	1	1	2	2	2
2	1	1	2	2	1	1	1	1	1	2	2
2	3	2	1	2	1	1	1	1	2	2	2
2	3	2	2	2	2	2	1	1	1	2	1
2	1	2	2	2	1	1	1	1	2	2	1
1	3	1	2	1	1	1	2	1	1	2	2
1	3	2	2	2	2	1	1	1	2	2	2
1	1	1	2	2	1	2	2	1	1	2	1
1	1	2	2	2	2	1	1	1	2	2	2
1	1	2	2	1	1	2	2	1	1	2	3
1	3	1	2	2	1	1	1	1	2	2	3
1	3	1	2	2	2	1	2	1	1	2	3
1	3	2	2	2	1	2	1	1	2	2	3
1	3	2	2	2	1	1	2	1	2	2	3
1	3	2	2	2	1	1	1	1	1	2	3
1	1	2	2	2	2	2	2	1	2	2	3
1	1	2	2	2	1	1	1	1	1	1	2
1	3	2	2	2	1	1	2	1	2	2	3
1	1	2	2	2	1	2	1	1	1	2	3
1	1	2	2	2	2	2	2	1	2	1	1
1	1	1	2	2	1	1	1	1	2	1	2
1	1	2	2	2	2	1	2	1	1	2	1
1	1	2	2	2	1	2	1	1	2	1	1
1	1	2	2	2	1	1	2	1	1	1	2
1	1	2	2	2	2	2	1	1	2	1	1
1	1	2	2	2	1	1	2	1	1	1	1
1	1	1	2	2	1	2	1	1	2	1	1
1	3	2	2	1	1	2	2	1	2	2	3
1	1	2	1	2	2	1	1	1	1	1	1
1	3	1	2	2	2	2	2	1	2	2	3
1	3	2	2	2	2	2	1	1	1	2	3
1	1	2	2	2	2	1	2	1	2	1	1
1	3	2	2	2	2	2	1	1	1	2	3
1	3	1	1	2	2	1	2	1	2	2	1
1	2	1	2	2	2	1	1	1	2	1	1
1	2	1	2	2	2	2	2	1	1	1	1
1	1	1	2	2	2	1	1	1	2	1	2
1	3	1	2	2	1	2	2	1	1	2	2
1	1	1	2	2	2	2	1	1	2	2	3
1	1	2	2	2	1	2	2	1	1	1	2
1	1	1	2	2	2	2	1	1	2	2	3
1	1	2	2	2	2	1	2	1	2	1	1
1	1	2	2	2	2	2	1	1	1	2	3
1	3	1	2	2	2	1	2	1	2	2	2
1	1	2	2	2	2	2	1	1	1	1	1
1	1	2	2	2	2	1	2	1	2	1	1
1	1	1	1	2	2	1	1	1	1	1	1
1	1	2	1	2	1	2	2	1	2	2	3
1	1	2	1	2	2	1	1	1	2	1	1
1	1	1	1	2	2	1	2	1	1	1	1
1	1	2	1	2	1	2	1	1	2	2	3
1	2	2	2	2	2	2	2	1	1	2	3
1	1	1	2	1	2	2	1	1	2	1	2
1	3	2	1	2	1	2	2	1	1	2	3
1	2	2	1	1	2	1	1	1	2	2	2
1	1	1	1	2	1	1	2	1	2	1	1
1	1	2	1	2	2	1	1	1	1	2	2
1	3	2	1	2	2	2	2	1	2	2	3
1	3	2	2	2	2	1	1	1	1	2	3
1	1	2	2	2	2	2	2	1	2	1	1
1	1	2	2	2	2	1	1	1	1	2	3
1	1	1	2	2	2	2	2	1	2	1	1
1	1	1	2	2	2	2	1	1	2	1	2
1	1	2	2	2	2	2	2	1	1	2	3
1	1	1	1	2	2	1	1	1	2	1	2
1	1	2	1	2	2	1	2	1	1	2	2
1	1	1	1	2	2	2	1	1	2	1	2
1	2	2	1	2	1	1	2	1	1	2	3
1	1	1	1	2	2	2	1	1	2	1	1
1	1	1	2	2	2	2	2	1	2	1	1
1	1	2	2	2	1	1	1	1	1	1	1
1	1	1	2	2	2	2	2	1	2	1	2
1	1	2	1	2	2	2	1	1	1	1	1
1	1	2	1	2	2	1	2	1	2	1	2
1	1	1	1	2	2	2	1	1	1	1	1
1	1	1	1	2	2	2	2	1	1	1	2
1	1	1	1	2	2	1	1	1	1	1	2
1	3	2	2	2	1	2	2	1	1	2	2
1	1	1	2	2	2	1	1	1	1	2	2
1	2	2	1	2	2	2	2	1	1	2	3
1	1	1	2	2	2	2	1	1	1	1	2
1	1	1	2	2	1	1	2	1	1	1	2
1	1	2	2	2	2	2	1	1	1	1	2
1	1	1	2	2	2	2	2	1	2	1	1
1	1	2	1	2	2	1	1	1	1	1	1
1	2	1	2	2	2	2	2	1	2	2	2
1	1	2	2	2	2	2	1	1	1	1	1
1	1	2	1	2	2	1	2	1	2	1	1
1	1	1	2	2	2	2	1	1	1	1	2
1	1	2	1	2	2	1	2	1	2	1	2
1	1	2	1	2	2	2	1	1	2	1	2
1	1	1	2	1	2	2	2	1	1	1	2
1	1	2	1	2	2	1	1	1	2	1	2
1	3	1	2	2	2	1	2	1	1	2	3
1	1	2	1	2	1	2	1	1	2	1	2
1	1	2	1	2	2	2	2	1	1	1	2
1	1	1	2	2	2	1	1	1	2	1	2
1	1	1	1	2	2	1	2	1	2	1	1
1	1	1	2	2	2	2	1	1	1	2	3
1	1	2	1	2	1	1	2	1	2	1	1
1	1	1	2	2	2	1	1	1	1	1	2
1	1	2	1	2	2	2	2	1	2	1	1
1	1	1	2	2	2	1	1	1	1	1	2
1	1	2	1	2	2	1	1	1	2	1	1
1	1	1	2	2	2	2	1	1	2	1	2
1	1	1	2	2	2	2	1	1	1	1	2
1	1	2	1	2	2	2	1	1	2	1	1
1	3	1	2	2	1	1	1	1	1	2	3
1	1	2	1	1	2	1	1	1	2	1	2
1	1	1	2	2	2	2	1	2	1	1	1
1	3	2	2	1	1	2	1	1	2	2	3
1	1	2	2	2	2	1	1	2	1	1	1
1	1	2	1	1	2	1	1	1	2	1	2
1	1	2	1	2	2	2	1	2	1	1	1
1	1	1	2	2	1	1	1	1	2	1	1
1	1	1	1	2	2	2	1	2	1	1	2
1	1	2	1	2	2	2	1	1	2	1	2
1	1	2	1	2	1	1	1	2	1	1	2
1	1	2	1	2	1	2	1	1	1	1	2
1	1	1	2	1	1	2	1	2	1	1	2
1	1	2	1	1	1	1	1	1	1	1	2
1	1	2	1	2	1	1	1	2	1	1	2
1	1	2	1	2	1	2	1	1	1	1	2
1	1	2	1	2	1	1	1	2	1	1	1
1	1	1	1	1	1	1	1	1	1	1	2
1	1	1	1	2	1	1	1	2	1	1	2
1	1	2	1	2	1	2	1	1	1	1	1
1	1	2	1	1	1	1	1	2	1	1	2
1	3	1	2	2	1	1	1	1	1	2	3
1	1	1	1	1	1	1	1	2	1	1	2
1	1	1	2	2	1	1	1	1	1	1	2
1	3	1	1	2	1	2	1	2	1	2	3
1	1	1	2	1	1	2	1	1	1	1	2
1	1	1	2	2	1	1	1	2	1	2	2
1	1	1	1	2	1	2	1	1	1	1	2
1	1	2	1	1	1	1	1	2	1	1	2
1	1	1	2	2	1	2	1	1	1	1	2
1	1	1	1	1	1	2	1	2	1	1	2
1	1	1	2	2	1	1	1	1	1	1	2
1	1	2	1	2	1	2	1	2	1	1	2
1	1	1	2	1	1	1	1	1	1	1	2
1	1	1	1	1	1	2	1	2	1	1	2
1	1	1	1	2	1	2	1	1	1	1	2
1	1	1	1	2	1	1	1	2	1	1	2
1	1	1	1	2	1	1	1	1	1	1	2
1	1	1	1	2	1	2	1	2	1	1	2
1	1	1	1	1	1	1	1	1	1	1	2
1	1	1	1	2	1	2	1	2	1	1	2
1	1	1	2	2	1	1	1	1	1	2	2
1	1	1	1	2	1	2	1	2	1	1	1
1	1	1	1	2	1	1	1	1	1	1	2
1	1	2	1	1	1	1	1	2	1	2	3
1	1	1	2	2	1	2	1	1	1	1	2
1	1	1	1	1	1	1	1	2	1	2	3
1	1	1	1	2	1	1	1	1	1	1	2
1	1	2	1	1	1	1	1	2	1	1	2
1	1	1	2	2	2	2	1	1	1	1	2
1	1	1	1	2	1	2	1	2	1	1	2
1	1	2	1	2	2	1	1	1	1	1	2
1	1	1	1	1	1	2	1	2	1	2	1
1	1	2	1	2	1	1	1	1	1	1	2
1	1	2	1	2	2	1	1	2	1	1	2
1	1	2	1	1	1	2	1	1	1	1	2
1	1	1	1	2	2	1	1	2	1	1	1
1	1	2	1	1	2	1	1	1	1	1	2
1	3	2	1	2	2	2	1	2	1	2	2
1	1	1	2	2	2	2	1	1	1	1	2
1	1	1	1	1	1	1	1	2	1	1	1
1	1	1	1	2	1	2	1	1	1	1	2
1	1	1	2	2	1	1	1	2	1	2	3
1	1	1	1	2	1	1	1	1	1	1	2
1	1	1	2	1	1	2	1	2	1	1	2
1	1	2	1	2	1	1	1	1	1	1	1
1	1	1	2	1	2	1	1	2	1	1	2
1	1	1	1	2	1	2	1	1	1	1	2
1	1	1	1	2	1	2	1	2	1	1	2
1	1	1	1	2	1	1	1	1	1	1	2
1	1	1	1	1	1	2	1	2	1	1	2
1	1	1	1	2	1	1	1	1	1	1	2
1	1	2	1	1	2	2	1	2	1	2	3
1	1	1	1	2	1	1	1	1	1	1	2
1	1	1	2	2	1	2	1	2	1	1	2
1	1	2	1	1	2	1	1	1	1	2	1
1	1	1	2	2	1	1	1	2	1	1	2
1	1	1	1	1	2	2	1	1	1	1	2
1	3	1	2	1	1	1	1	2	1	2	3
1	3	2	1	2	1	2	1	1	1	2	2
1	1	1	1	1	2	1	1	2	1	1	1
1	3	2	2	1	2	1	1	1	1	2	2
1	1	1	1	2	2	1	1	2	1	1	2
1	3	2	2	2	1	2	1	1	1	2	2
1	1	2	1	2	2	1	1	2	1	2	2
1	1	1	1	1	1	1	1	1	1	2	3
1	1	1	1	2	2	2	1	2	1	2	2
1	1	2	1	2	1	2	1	1	1	2	2
1	1	1	1	2	2	1	1	2	1	1	1
1	1	1	1	2	2	1	1	1	1	2	2
1	3	1	1	2	1	1	1	2	1	2	2
1	1	1	1	1	1	2	1	1	1	1	2
1	1	2	2	2	2	2	1	2	1	1	2
1	1	2	1	2	1	1	1	1	1	2	2
1	1	2	2	2	1	2	1	2	1	1	2
1	1	1	1	2	2	2	1	1	1	1	1
1	3	2	2	2	1	1	1	2	1	2	3
1	3	2	1	2	2	2	1	1	1	2	3
1	1	2	1	2	1	1	1	2	1	2	3
1	1	1	1	1	1	2	1	1	1	2	2
1	1	2	1	2	2	1	1	2	1	2	2
1	1	1	1	2	1	2	1	1	1	2	3
1	1	1	1	2	1	2	1	2	1	2	2
1	1	2	1	2	2	1	1	1	1	2	2
1	3	1	1	1	2	2	1	2	1	2	2
1	3	1	2	2	1	1	1	1	1	2	2
1	1	1	1	2	1	1	1	2	1	1	1
1	1	1	2	2	2	1	1	1	1	2	2
1	1	1	1	2	1	1	1	2	1	1	1
1	1	1	1	2	2	2	1	1	1	1	1
1	1	2	2	1	2	1	1	2	1	2	2
1	1	2	1	2	1	2	1	1	1	2	2
1	1	1	2	2	1	1	1	2	1	1	2
1	1	2	2	1	2	2	1	1	1	2	2
1	1	2	1	2	1	1	1	1	1	2	2
1	1	1	2	1	1	2	1	1	1	1	2
1	1	2	1	2	2	1	1	1	1	2	2
1	1	2	2	1	1	2	1	1	1	2	2
1	3	2	1	2	1	2	1	1	1	2	2
1	3	1	2	1	1	1	1	1	1	2	2
1	1	1	2	1	1	1	1	1	1	1	1
1	3	1	1	2	2	1	1	1	1	2	2
1	3	1	2	2	1	1	1	1	1	2	2
1	3	1	1	2	2	1	1	1	1	2	1
1	1	1	1	2	1	2	1	1	1	1	1
1	3	2	1	2	2	2	1	1	1	2	3
1	1	1	1	1	2	2	1	1	1	1	2
1	3	2	2	1	2	2	1	1	1	2	2
1	1	2	2	2	1	1	1	1	1	2	2
1	3	2	1	2	1	2	1	1	1	2	2
1	3	1	1	2	2	1	1	1	1	2	2
1	3	1	2	2	1	1	1	1	1	2	2
1	1	2	1	1	1	2	1	1	1	2	3
1	1	2	2	2	1	1	1	1	1	2	2
1	1	1	1	1	2	1	1	1	1	2	2
1	1	1	1	2	1	2	1	1	1	2	2
1	1	1	1	2	1	1	1	1	1	1	1
1	1	2	1	1	2	1	1	1	1	2	2
1	1	1	1	2	1	2	1	1	1	2	2
1	1	1	1	1	2	2	1	1	1	1	1
1	3	1	1	2	1	1	1	1	1	2	2
1	1	1	1	2	2	1	1	1	1	2	1
1	1	1	1	2	2	2	1	1	1	1	1
1	3	1	1	2	1	1	1	1	1	2	2
1	3	2	2	1	1	1	1	1	1	2	3
1	3	2	1	2	2	2	1	1	1	2	2
1	1	1	1	2	1	1	1	1	1	1	1
1	3	1	1	1	2	1	1	1	1	2	3
1	3	1	2	1	1	1	1	1	1	2	2
1	1	2	1	2	1	1	1	1	1	1	1
1	3	1	1	2	1	2	1	1	1	2	2
1	1	2	1	2	2	1	1	1	1	1	1
1	3	2	1	2	1	1	1	1	1	2	3
1	3	1	1	2	1	2	1	1	1	2	3
1	3	1	1	1	2	1	1	1	1	2	3
1	1	1	1	2	1	2	1	1	1	1	1
